# Supplementary material for: Orthogonal design-driven in situ encapsulation of hyaluronic acid-poly (lactic acid) composite hydrogels: mechanically tunable dermal fillers with enhanced enzymatic resistance
Source: Royal Society of Chemistry journal article supplement (doi:10.1039/d5ra04259c), 2025-01-01
Supplement: d5ra04259c1.pdf [file d5ra04259c1.pdf]

Supporting information

## Orthogonal Design-Driven *In-Situ* Encapsulation of Hyaluronic Acid-Poly (Lactic acid) Composite Hydrogels: Mechanically Tunable Dermal Fillers with Enhanced Enzymatic Resistance

Jiahong Guo,<sup>a,b</sup> Hang Li<sup>c</sup> and Feifei Wang<sup>a,d,\*</sup>

a. Yunnan Botanee Bio-technology Group Co., Ltd., Yunnan 650106, China.

b. Shanghai Jiyan Bio-pharmaceutical Co., Ltd., Shanghai 201702, China.

c. Shanghai Botanee Health Technology Co., Ltd., Shanghai 201706, China.

d. Yunnan Characteristic Plant Extraction Laboratory Co., Ltd., Yunnan 650106, China.

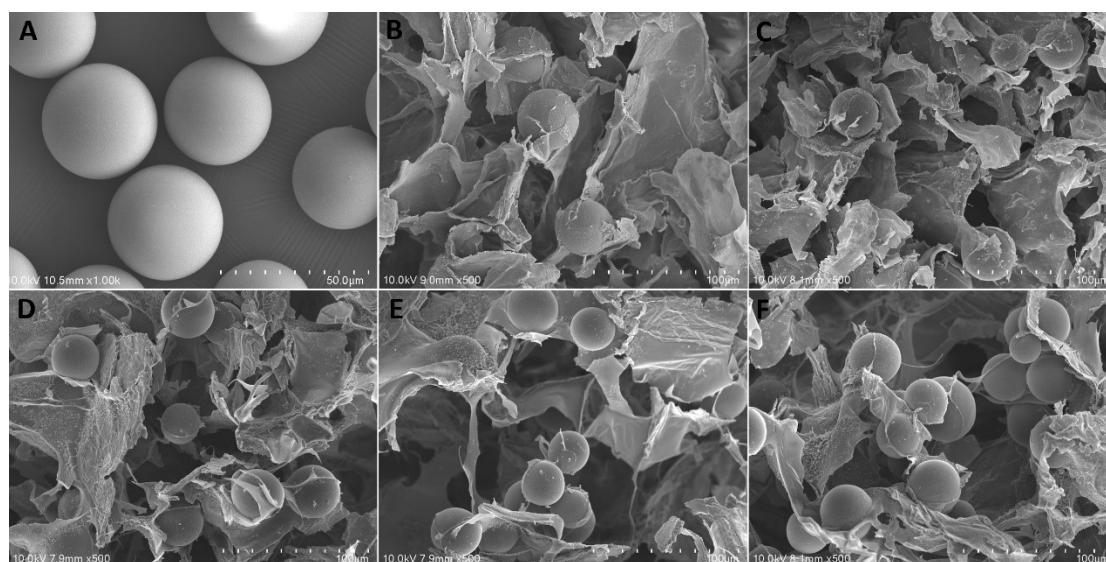

**Fig.1S** Morphological evolution of CHPs as a function of PLLA feed loading. (A) Surface morphology of pure PLLA microspheres at 1000x magnification. (B-F) Higher-magnification (500x) of the CHPs as PLLA feed loading (2%, 4%, 6%, 8%, 10% w/v).

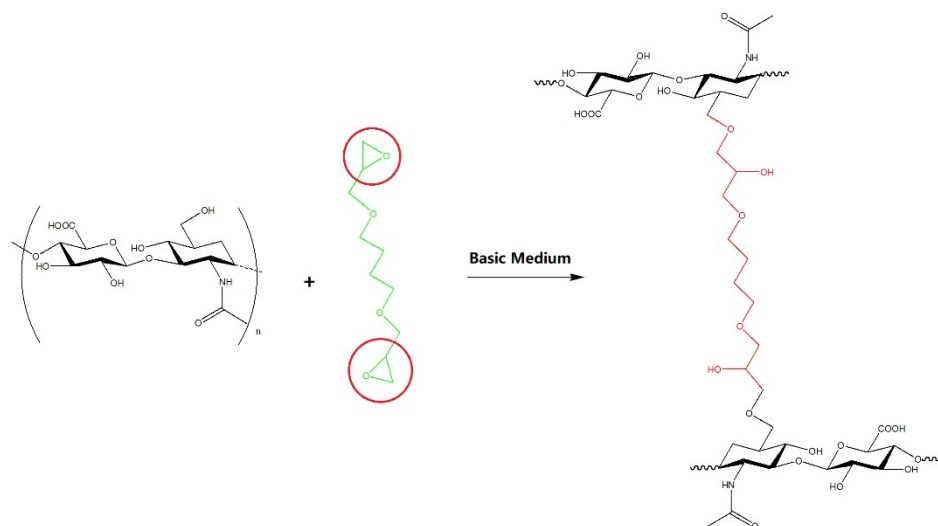

**Fig. 25** Chemical crosslinking reaction between HA chains and BDDE.
